# Supplementary material
Source: PubMed Central journal article supplement (PMC4020083)
Supplement: 1318017111_pnas.201318017SI.pdf [file 1318017111_pnas.201318017SI.pdf]

# Supporting Information

Mesgarani et al. 10.1073/pnas.1318017111

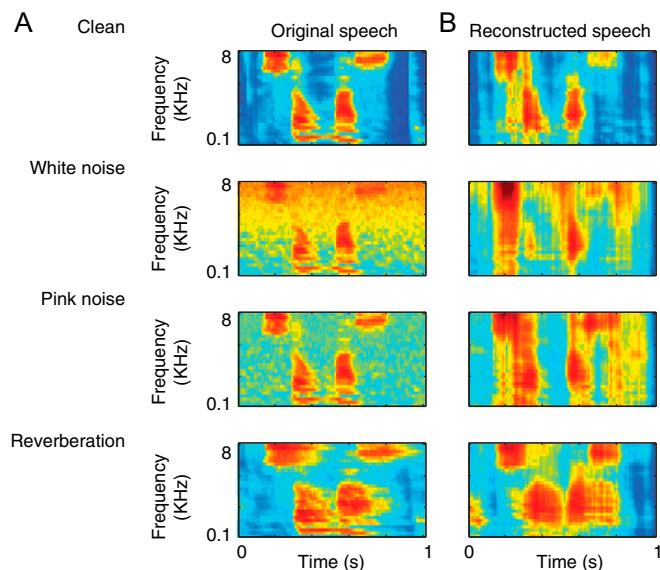

**Fig. S1.** Reduced stimulus distortions in spectrograms reconstructed from the ferret primary auditory cortex (A1) population response. (A) Original and (B) reconstructed spectrograms of clean and distorted speech estimated using reconstruction filters obtained from responses to clean and noisy speech. The reconstructed spectrograms from the population response of A1 neurons to the distorted speech show an improved signal-to-noise ratio compared with the original noisy signals, similar to the effect seen in Fig. 2.
